# Supplementary material for: Electrical property enhancement of electrically conductive adhesives through Ag-coated-Cu surface treatment by terephthalaldehyde and iodine
Source: Royal Society of Chemistry journal article supplement (doi:10.1039/c5tc00593k), 2015-01-01
Supplement: c5tc00593k1.pdf [file c5tc00593k1.pdf]

# Electrical Property Enhancement of Electrically Conductive Adhesives Through Ag-coated-Cu Surface Treatment by Terephthalaldehyde and Iodine

*Chaowei Li*<sup>a,b</sup>, *Xike Gong*<sup>a</sup>, *Lei Tang*<sup>a,b</sup>, *Kai Zhang*<sup>a</sup>, *Jie Luo*<sup>a</sup>, *Lin Ling*<sup>a</sup>, *Jun Pu*<sup>a</sup>,  
*Taotao Li*<sup>a</sup>, *Mingxing Li*<sup>b</sup>, *Yagang Yao*<sup>a\*</sup>

<sup>a</sup> Division of Advanced Nanomaterials, Key Laboratory of Nanodevices and Applications, Suzhou Institute of Nano-tech and Nano-bionics, Chinese Academy of Sciences, University of Chinese Academy of Sciences, Suzhou 215123, China

<sup>b</sup> Department of Chemistry, College of Sciences, Shanghai University, Shanghai 200444, China

## **Corresponding Authors**

\*Y.Y.: e-mail: [ygyao2013@sinano.ac.cn](mailto:ygyao2013@sinano.ac.cn)

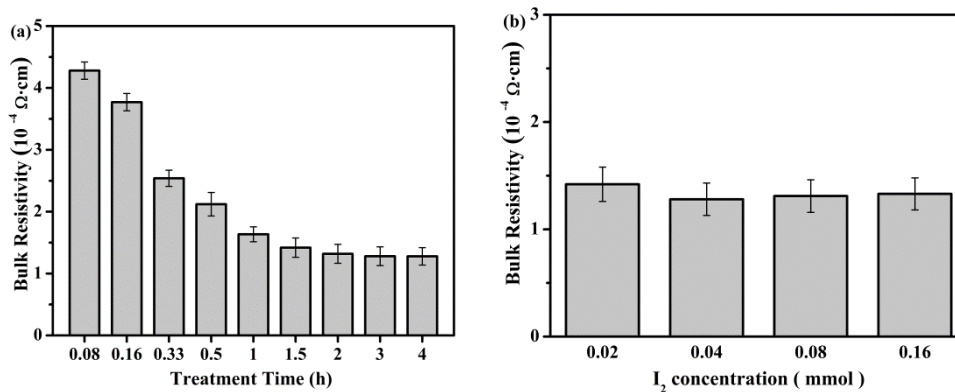

Figure S1. (a) Bulk resistivity of ECAs with TPTA and  $\text{I}_2$  (30/1 mole ratio) treated Ag-coated-Cu flakes with different treatment time; (b) Bulk resistivity of ECAs with TPTA and  $\text{I}_2$  (30/1 mole ratio) treated Ag-coated-Cu flakes with different  $\text{I}_2$  amount.

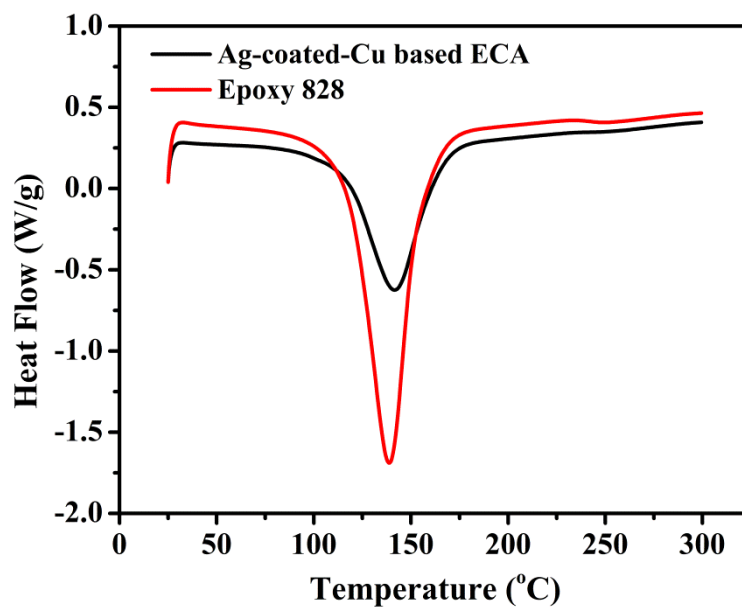

Figure S2. DSC of Ag-coated-Cu based ECA and epoxy 828.

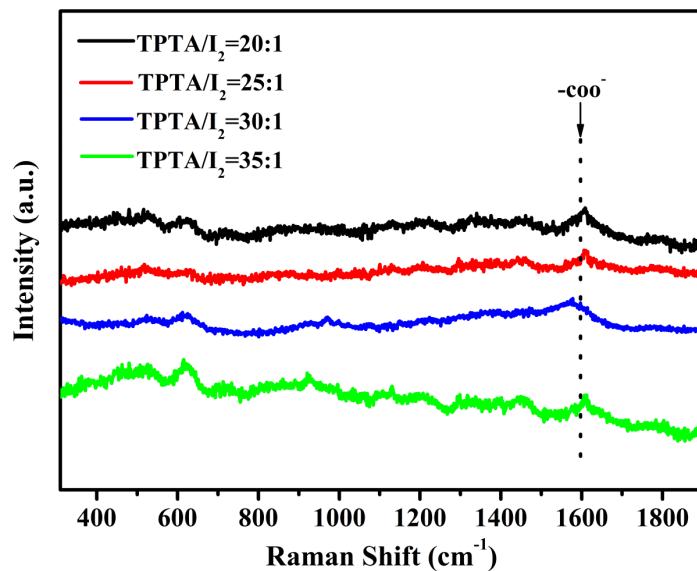

Figure S3. Raman spectrum of Ag-coated-Cu flakes treated by different mole ratio of TPTA/I<sub>2</sub>.

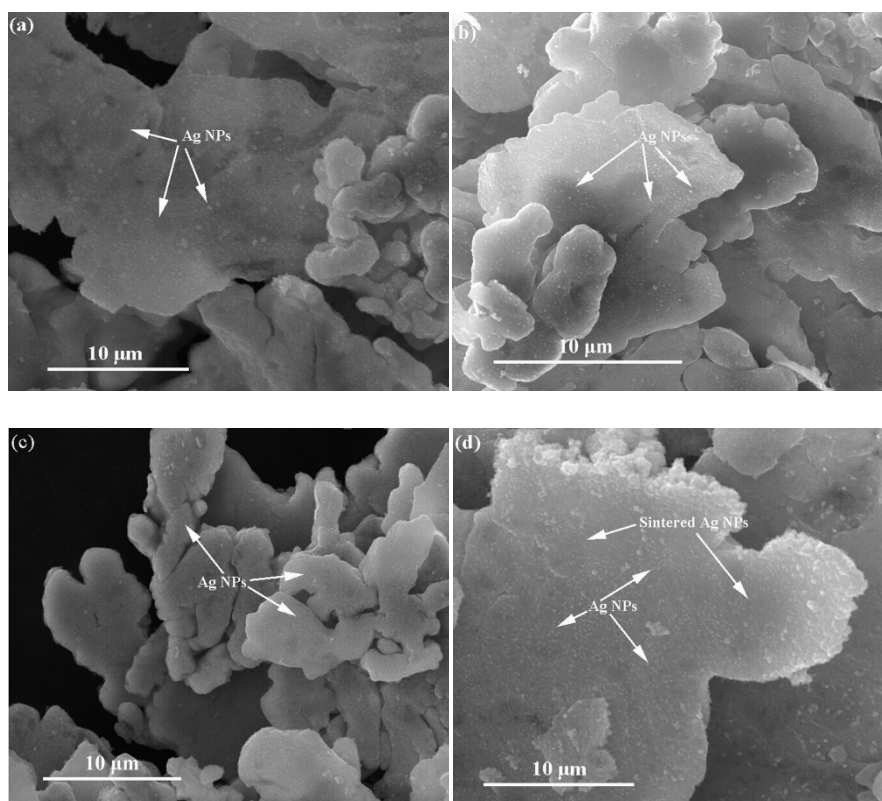

Figure S4. TPTA and I<sub>2</sub> modified Ag-coated-Cu flakes were treated at different temperatures (a) at 150 °C for 1 h; (b) at 160 °C for 1 h; (c) at 170 °C for 1 h; and (d) at 180 °C for 1 h. It is obvious that the Ag nanoparticles begin to sinter at 180 °C.
